# Supplementary material for: Digital health app development standards: a systematic review protocol
Source: PubMed Central journal article supplement (PMC6104800; doi:10.1136/bmjopen-2018-022969), 2018-08-17
Supplement: bmjopen-2018-022969supp001.pdf [file bmjopen-2018-022969supp001.pdf]

## Supplementary File

### Draft preliminary search

Regulatory website (International Organization for Standardization [ISO]) search terms (with limited search functions) in the technical sector of health (to be adapted for other websites)

1. Health app
2. Medical app
3. Health software
4. Medical software
5. Medical device
6. Health Information Technology System
7. Medical Information Technology System
8. Health IT system
9. Medical IT system

MEDLINE search strategy (to be adapted for other databases)

Health apps terms combined with OR:

Medical device\*.ti,ab,kw.

Health app\*.ti,ab,kw.

Medical app\*.ti,ab,kw.

Wearable\*.ti,ab,kw.

Mobile Applications/

Medical Informatics Applications/

Standards terms combined with OR:

(Standard\* or framework\* or Guideline\* or Guidance or best practice\* or Risk Assessment\* or road map\* or roadmap\*) adj3 (Medical device\* OR Health app\* OR Medical app\* OR Wearable\*).ti,ab,kw.

Medical Device Legislation/st, td [Standards, Trends]

Device Approval/lj, st [Legislation & Jurisprudence, Standards]

Practice Guideline/

Risk Assessment/lj, mt, st [Legislation & Jurisprudence, Methods, Standards]

Government Regulation/

Final result = 1 AND 2

No limitations to be applied to the search strategy

## Draft data extraction sheet

| Items                                                        | Data | RIGHT checklist item <sup>20</sup> |
|--------------------------------------------------------------|------|------------------------------------|
| <i>Basic information</i>                                     |      |                                    |
| Title/subtitle                                               |      | 1a                                 |
| Year of publication                                          |      | 1b                                 |
| Focus                                                        |      | 1c                                 |
| Scope                                                        |      |                                    |
| Category (health app, medical device, software for medicine) |      |                                    |
| Executive summary                                            |      | 2                                  |
| Abbreviations and acronyms                                   |      | 3                                  |
| Definitions                                                  |      |                                    |
| Corresponding author/developer                               |      | 4                                  |
| Organisation                                                 |      |                                    |
| <i>Background</i>                                            |      |                                    |
| Description of the problem                                   |      | 5                                  |
| Aim                                                          |      | 6                                  |
| Primary population                                           |      | 7a                                 |
| Subgroups                                                    |      | 7b                                 |
| Intended primary users                                       |      | 8a                                 |
| Setting for intended use                                     |      | 8b                                 |
| Document development group contributors                      |      | 9a                                 |
| Individuals involved in developing document                  |      | 9b                                 |

| <i>Evidence</i>                                                                                                                                                                                                                      |  |     |
|--------------------------------------------------------------------------------------------------------------------------------------------------------------------------------------------------------------------------------------|--|-----|
| Key questions                                                                                                                                                                                                                        |  | 10a |
| Selection of outcomes                                                                                                                                                                                                                |  | 10b |
| Systematic review undertaken or used                                                                                                                                                                                                 |  | 11a |
| If based on existing systematic review, description of identification and assessment (provide the search strategies and the selection criteria, and description of how the risk of bias was evaluated) and whether they were updated |  | 11b |
| Approach used for assessing evidence                                                                                                                                                                                                 |  | 12  |
| Mention of other standards, guidelines, frameworks, and best practices                                                                                                                                                               |  |     |
| <i>Recommendations/requirements</i>                                                                                                                                                                                                  |  |     |
| Clear, precise, and actionable recommendations/requirements                                                                                                                                                                          |  | 13a |
| Evidence for important subgroups                                                                                                                                                                                                     |  | 13b |
| Strength of recommendations/requirements                                                                                                                                                                                             |  | 13c |
| Rationale/explanation for recommendations/requirements of target populations                                                                                                                                                         |  | 14a |
| Cost and resource implication for recommendations/requirements                                                                                                                                                                       |  | 14b |
| Other factors taken into consideration when formulating the recommendations, such as equity, feasibility and acceptability                                                                                                           |  | 14c |
| Evidence to decision process                                                                                                                                                                                                         |  | 15  |
| <i>Review and quality assurance</i>                                                                                                                                                                                                  |  |     |
| External review                                                                                                                                                                                                                      |  | 16  |
| Quality assurance                                                                                                                                                                                                                    |  | 17  |

|                                                                                                                                      |  |     |
|--------------------------------------------------------------------------------------------------------------------------------------|--|-----|
| <i>Funding, declaration and management of interest</i>                                                                               |  |     |
| Sources of funding for all stages of document development                                                                            |  | 18a |
| Role of funder(s) in the different stages of document development and in the dissemination and implementation of the recommendations |  | 18b |
| Types of conflicts (financial and non-financial)                                                                                     |  | 19a |
| How conflicts of interest were evaluated and managed                                                                                 |  | 19b |
| <i>Other information</i>                                                                                                             |  |     |
| Access                                                                                                                               |  | 20  |
| Suggestions for further research                                                                                                     |  | 21  |
| Limitations of document                                                                                                              |  | 22  |
| Comments                                                                                                                             |  |     |
